# Supplementary material for: Gelatin-Oxidized Alginate and Chitosan-Coated Zein Nanoparticle Hydrogel Composite to Enhance Breast Cancer Cytotoxicity in Dual-Drug Delivery
Source: PubMed Central journal article supplement (PMC11561619; doi:10.1021/acsomega.4c06404), 2024-10-31
Supplement: ao4c06404_si_001.pdf [file ao4c06404_si_001.pdf]

# **Gelatin-Oxidized Alginate and Chitosan-Coated Zein Nanoparticles Hydrogel Composite to Enhance Breast Cancer Cytotoxicity in Dual-Drug Delivery**

Sanierlly da Paz do Nascimento<sup>1</sup>, Ramon Ramos Marques de Souza<sup>2</sup>, Marianna Vieira Sobral<sup>2,5</sup>, Francisco Humberto Xavier-Junior<sup>2,5</sup>, Marcus Vinícius Santos da Silva<sup>3</sup>, Marcelo Machado Viana<sup>4</sup>, Fauston Fred da Silva<sup>1,6</sup>, Michael J. Serpe<sup>7</sup>, Antonia L. de Souza<sup>1,6\*</sup>

<sup>1</sup>Postgraduate Program in Chemistry, Universidade Federal da Paraíba, João Pessoa, 58051-900 PB, Brazil

<sup>2</sup>Postgraduate Program in Natural and Synthetic Bioactive Products, Universidade Federal da Paraíba, João Pessoa, 58051-900 PB, Brazil

<sup>3</sup>Institute of Physics, Federal University of Bahia, Salvador, 40170-290 BA, Brazil

<sup>4</sup>CTNano, Universidade Federal de Minas Gerais, Belo Horizonte, 31270-901 MG, Brazil

<sup>5</sup>Department of Pharmaceutical Sciences, Universidade Federal da Paraíba, João Pessoa, 58051-900 PB, Brazil

<sup>6</sup>Department of Chemistry, Universidade Federal da Paraíba, João Pessoa, 58051-900 PB, Brazil

<sup>7</sup>Department of Chemistry, University of Alberta, Edmonton, T6G 2R3 Alberta, Canada

\*Corresponding author: Antonia Lucia de Souza. Current e-mail addresses:

antonia\_lucia@yahoo.com.br

## **Supporting Information**

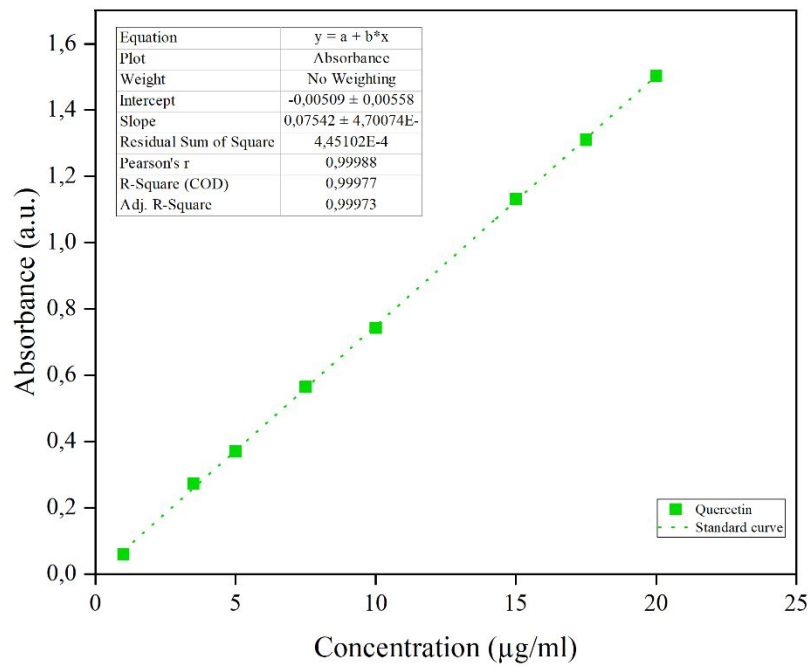

**Figure S1.** Quercetin calibration curve ( $\lambda = 373 \text{ nm}$ ) for loading capacity and efficiency

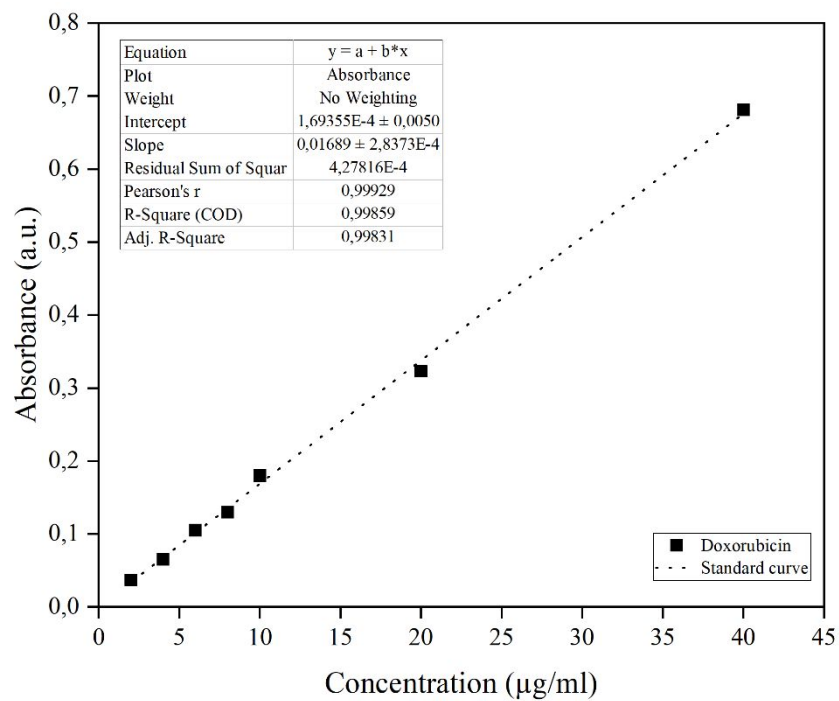

and release.

**Figure S2.** Doxorubicin calibration curve ( $\lambda = 478 \text{ nm}$ ) for drug release experiments.

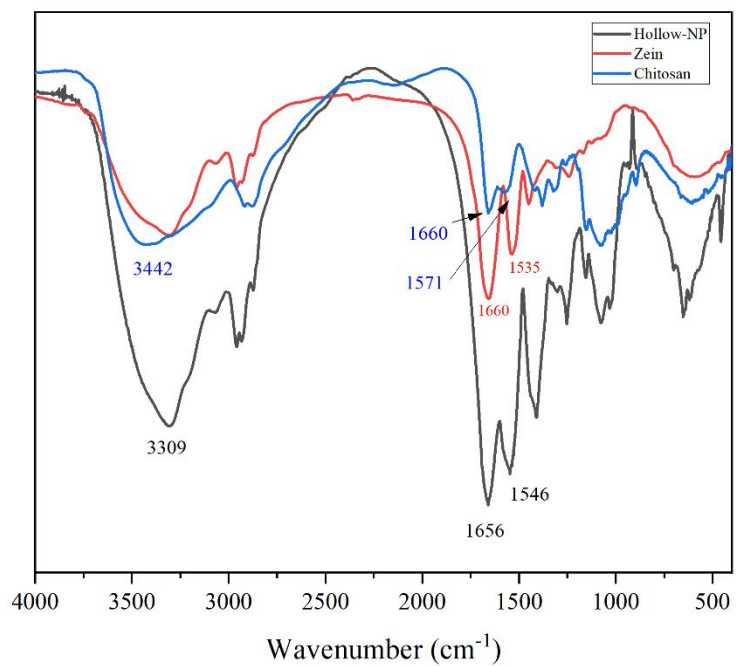

**Figure S3.** FTIR spectra of hollow chitosan-coated zein nanoparticles (NP) and its raw materials: Zein and chitosan.

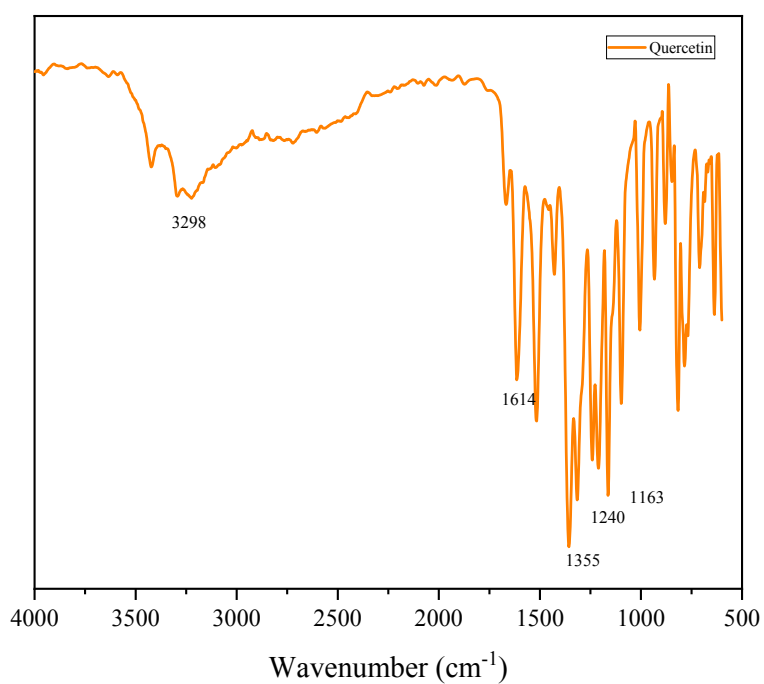

**Figure S4.** FTIR spectrum of quercetin.

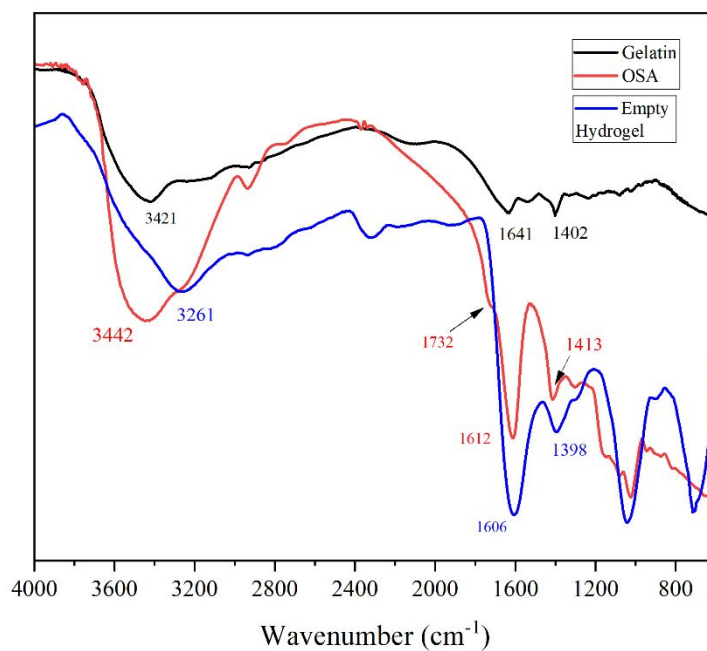

**Figure S5.** FTIR spectra of the empty Oxidized Alginate-Gelatin (OG) hydrogel and its raw materials: gelatin and oxidized alginate (OSA).

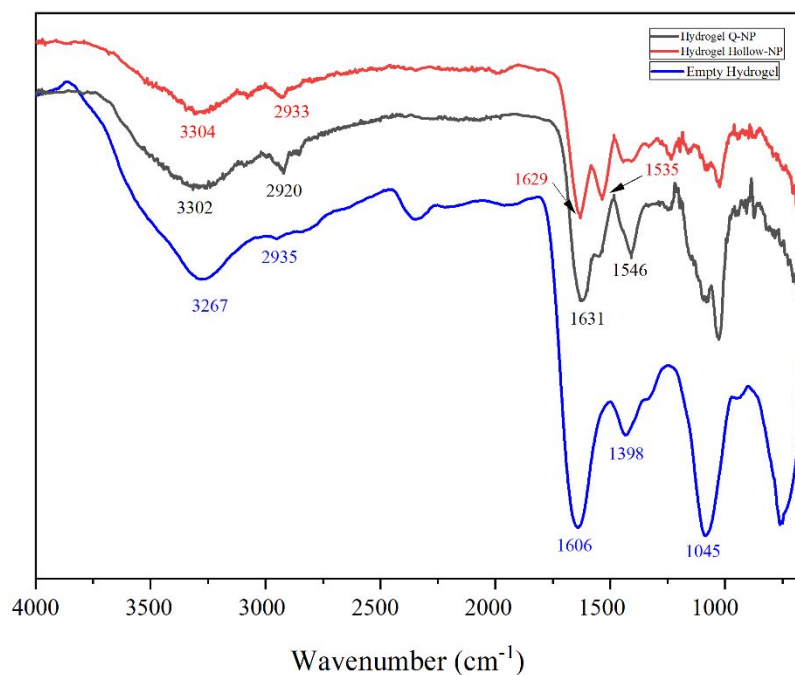

**Figure S6.** FTIR spectra of OG hydrogels: empty, loaded with hollow-nanoparticle (Hollow-NP), and loaded with quercetin-loaded nanoparticle (Q-NP).

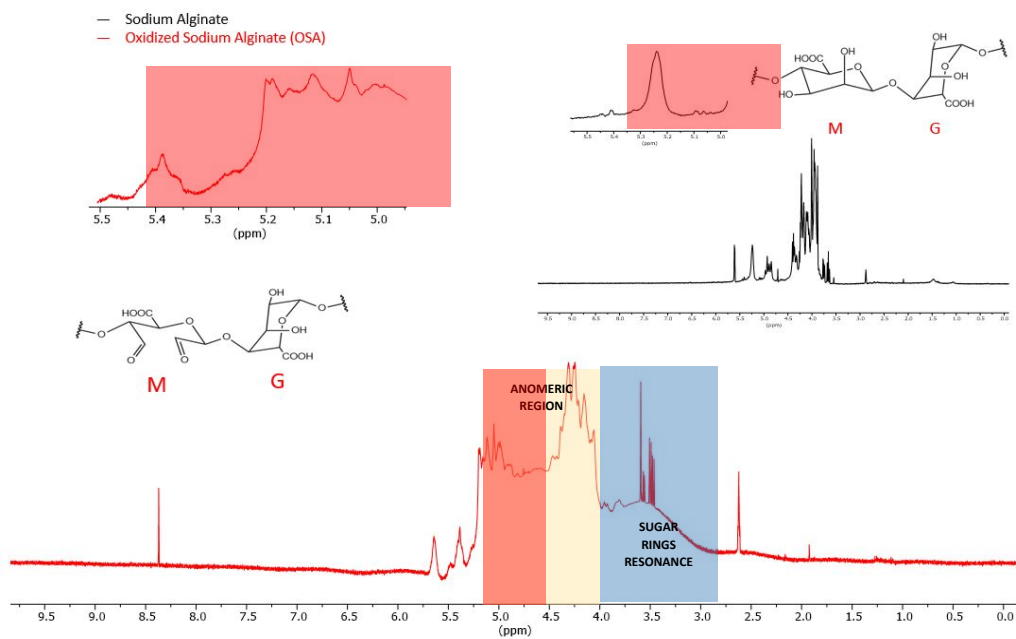

**Figure S7.** Sodium alginate and Oxidized Sodium Alginate  $^1\text{H}$ -Nuclear magnetic resonance ( $^1\text{H}$ -NMR,  $\text{D}_2\text{O}$ ) spectra.

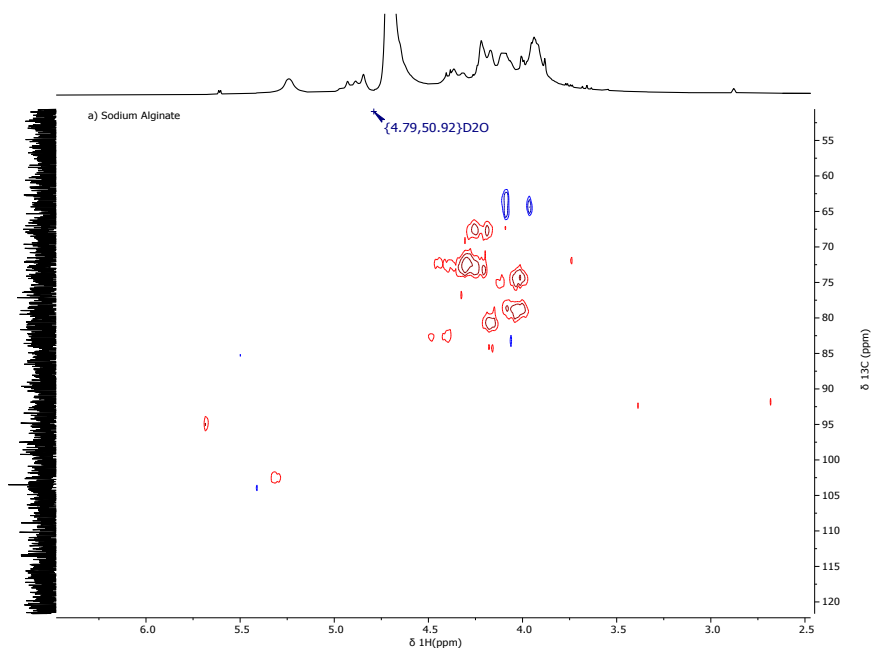

**Figure S8.**  $^1\text{H}$ - $^{13}\text{C}$  HSQC spectra of sodium alginate (SA) (a) and oxidized sodium alginate (OSA) (b) in  $\text{D}_2\text{O}/\text{DMSO-d}_6$  at RT (400 MHz NMR spectrometer).

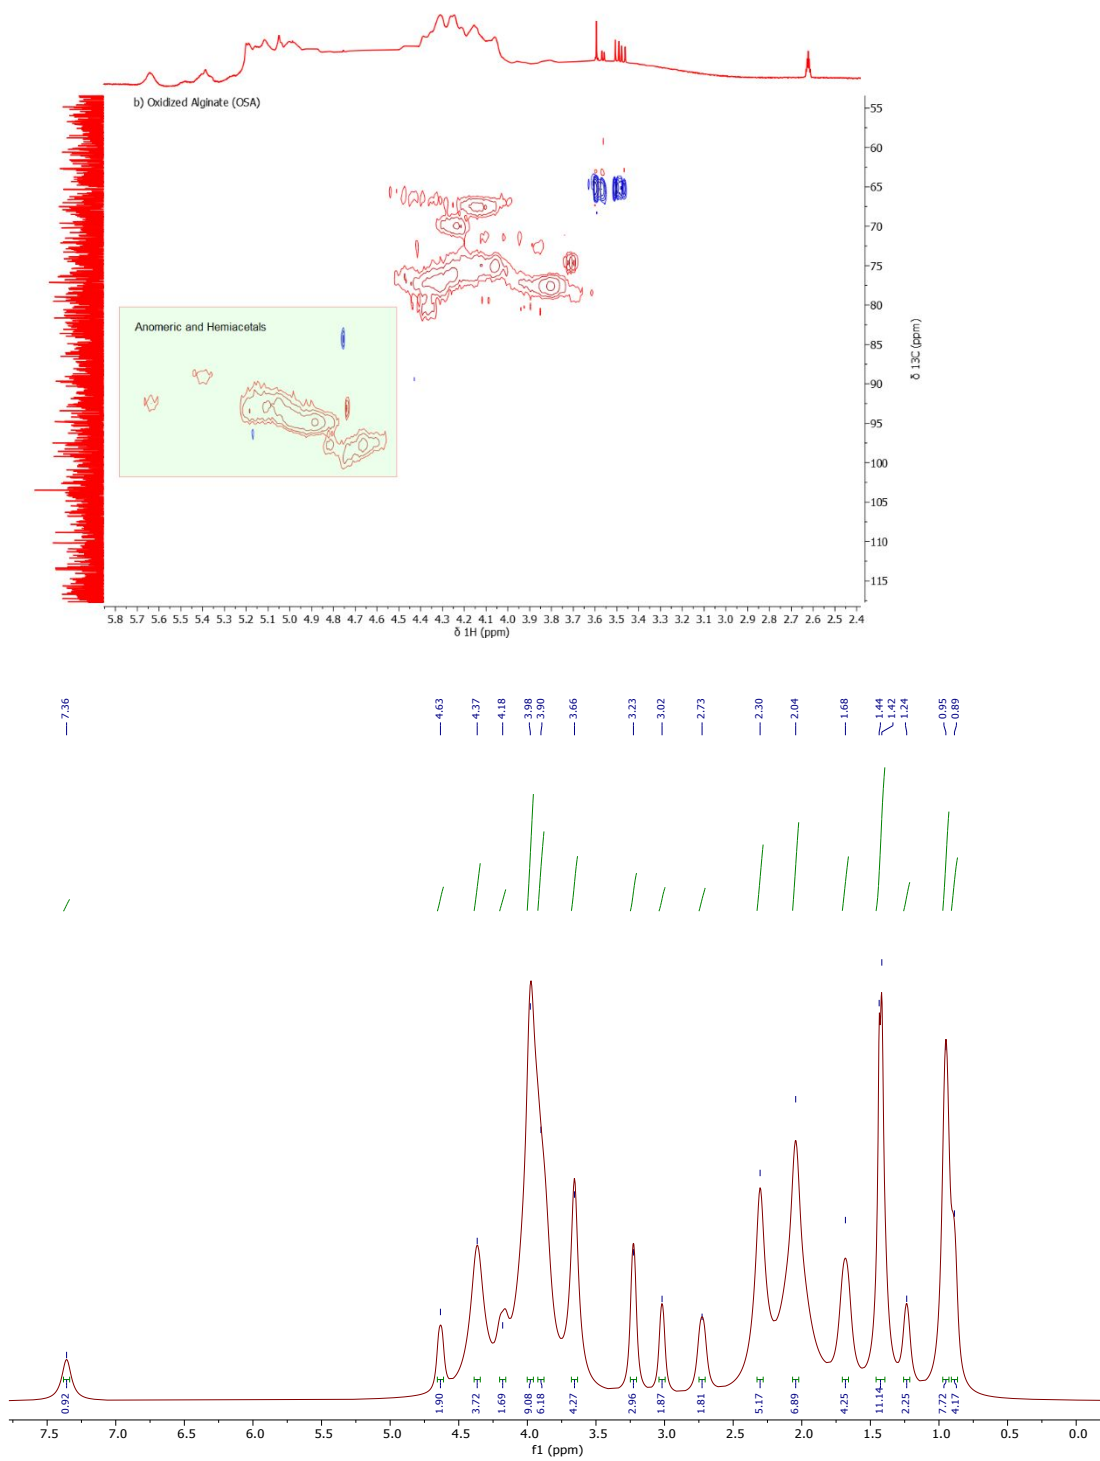

**Figure S9.** Gelatin <sup>1</sup>H-Nuclear magnetic resonance (<sup>1</sup>H-NMR) spectrum in D<sub>2</sub>O at RT in a 400 MHz NMR spectrometer.
